# Supplementary material
Source: PubMed Central journal article supplement (PMC152987)

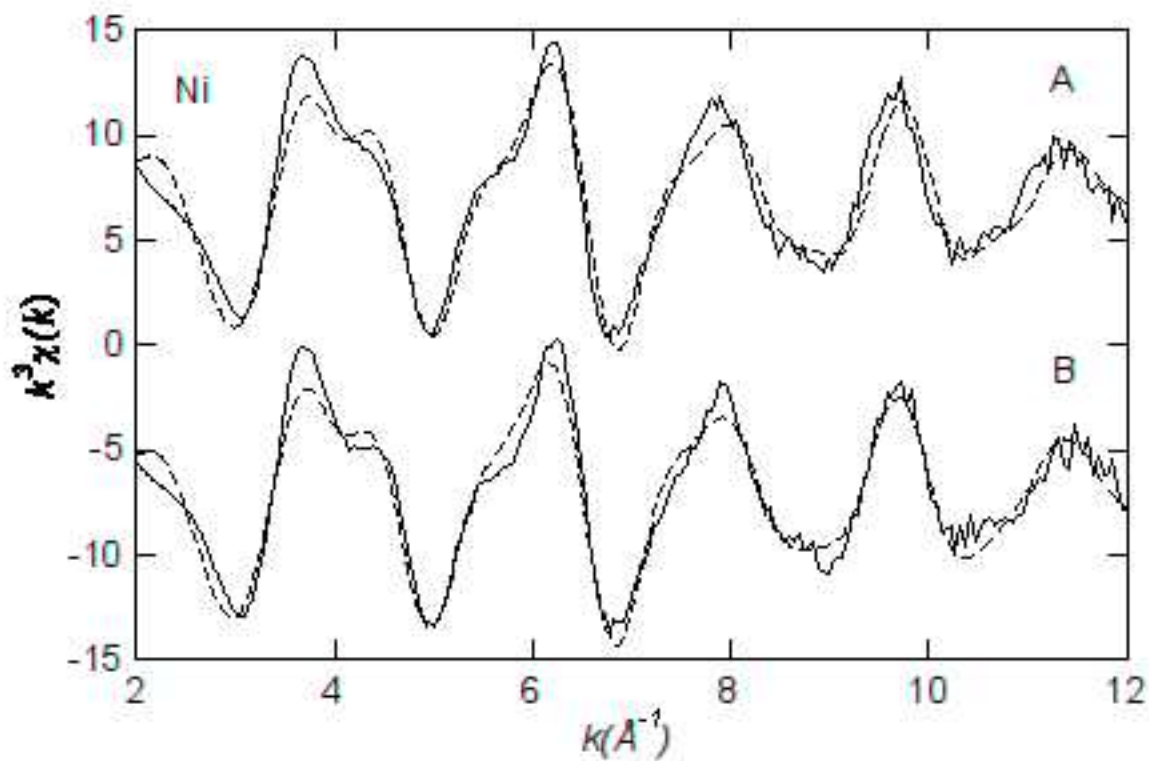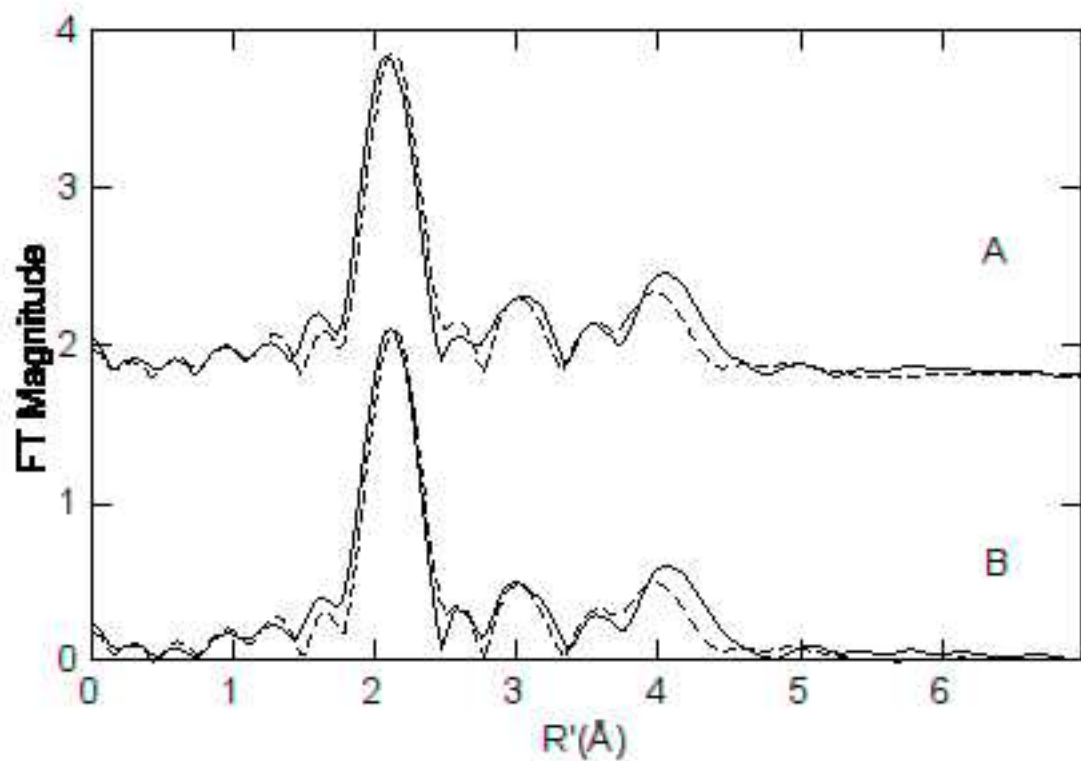

Supplement: pnas_0636943100_3.pdf [file pnas_0636943100_3.pdf]
